# Supplementary material
Source: PubMed Central journal article supplement (PMC2857057)

## SUPPLEMENTARY FIGURE LEGEND

Supplementary Figure 1: Ror2 is regulated by the combined effect of both HIF-1 $\alpha$  and HIF-2 $\alpha$  expression. Ror2 expression is additively reduced when both HIF $\alpha$  subunits are suppressed. qRT-PCR analysis of RCC4 2-1 cells, the same cells selected for stable knockdown of HIF-1 $\alpha$ , and the simultaneous transient suppression of HIF-2 $\alpha$  after 48hr in 2 independent knockdown experiments. Additive suppression of Ror2 expression with transient HIF-2 $\alpha$  suppression compared with HIF-1 $\alpha$  suppression alone was observed (\*p=0.041). Transcript values are shown as normalized to  $\beta$ -actin RNA internal standard and relative to the RCC4 2-1 cell line.

# Supplementary Figure 1

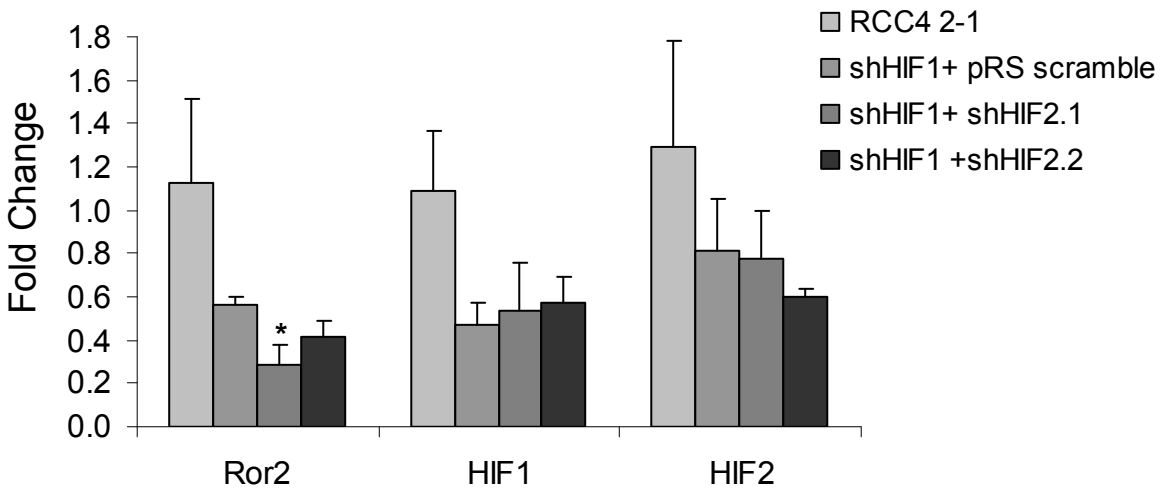

Supplement: supp_M109.073924_jbc.M109.073924-1.pdf [file supp_M109.073924_jbc.M109.073924-1.pdf]
